# Supplementary material
Source: MDPI journal article supplement (https://www.mdpi.com/2073-4441/15/15/2837)
Supplement: s1 [file s1]

Table S1 The luminescence decay results of TiO<sub>2</sub> NAs, TCN NAs, CQD/TCN NAs, and N, P-CQD/TCN NAs.

| Photoelectrode       | $\tau_1$ (ns) |
|----------------------|---------------|
| TiO <sub>2</sub> NAs | 3.90          |
| TCN NAs              | 4.08          |
| CQD/TCN NAs          | 5.04          |
| N, P-CQD/TCN NAs     | 5.28          |

Table S2 Condensed Fukui Index distribution on 1,4-D.

| Number | Atom | $q_k(N)$ | $q_k(N+1)$ | $q_k(N-1)$ | $f^0$    | $f^-$    | $f^+$    |
|--------|------|----------|------------|------------|----------|----------|----------|
| 1      | O    | -0.19734 | -0.25562   | -0.01918   | 0.11822  | 0.178153 | 0.058287 |
| 2      | O    | -0.19733 | -0.25562   | -0.01918   | 0.118219 | 0.178152 | 0.058285 |
| 3      | C    | 0.021149 | -0.04938   | 0.079693   | 0.064536 | 0.058544 | 0.070528 |
| 4      | C    | 0.021149 | -0.04938   | 0.079694   | 0.064537 | 0.058544 | 0.07053  |
| 5      | C    | 0.02115  | -0.04937   | 0.079694   | 0.064532 | 0.058543 | 0.07052  |
| 6      | C    | 0.02115  | -0.04937   | 0.079693   | 0.064533 | 0.058543 | 0.070522 |
| 7      | H    | 0.030559 | -0.03005   | 0.086759   | 0.058405 | 0.056201 | 0.060609 |
| 8      | H    | 0.046958 | -0.04277   | 0.093139   | 0.067956 | 0.046181 | 0.089731 |
| 9      | H    | 0.046959 | -0.04277   | 0.093139   | 0.067955 | 0.046181 | 0.08973  |
| 10     | H    | 0.030559 | -0.03005   | 0.086759   | 0.058407 | 0.0562   | 0.060613 |
| 11     | H    | 0.046959 | -0.04276   | 0.09314    | 0.06795  | 0.046181 | 0.089719 |
| 12     | H    | 0.03056  | -0.03004   | 0.086757   | 0.058399 | 0.056198 | 0.060601 |
| 13     | H    | 0.046959 | -0.04276   | 0.09314    | 0.06795  | 0.046181 | 0.089719 |
| 14     | H    | 0.030559 | -0.03005   | 0.086757   | 0.058401 | 0.056198 | 0.060605 |

Table S3 Typical organic pollutants in the pretreated pesticide wastewater identified using GC-MS.

| Number | Name                                                  | Molecular<br>formula                                          | Retention<br>time (min) |
|--------|-------------------------------------------------------|---------------------------------------------------------------|-------------------------|
| 1      | Phytol                                                | C <sub>20</sub> H <sub>40</sub> O                             | 13.61                   |
| 2      | Butylated Hydroxytoluene                              | C <sub>15</sub> H <sub>24</sub> O                             | 14.37                   |
| 3      | 1-Dodecanol, 2-octyl-                                 | C <sub>20</sub> H <sub>42</sub> O                             | 16.28                   |
| 4      | Ametryn                                               | C <sub>9</sub> H <sub>17</sub> N <sub>5</sub> S               | 21.54                   |
| 5      | Phthalic acid, butyl hept-4-yl ester                  | C <sub>16</sub> H <sub>22</sub> O <sub>4</sub>                | 22.12                   |
| 6      | Hexanedioic acid, dioctyl ester                       | C <sub>22</sub> H <sub>42</sub> O <sub>4</sub>                | 25.21                   |
| 7      | Bis(2-ethylhexyl) phthalate                           | C <sub>24</sub> H <sub>38</sub> O <sub>4</sub>                | 25.90                   |
| 8      | 1,3-Benzenedicarboxylic acid, bis(2-ethylhexyl) ester | C <sub>24</sub> H <sub>38</sub> O <sub>4</sub>                | 26.78                   |
| 9      | Cyclotrisiloxane, hexamethyl-                         | C <sub>6</sub> H <sub>18</sub> O <sub>3</sub> Si <sub>3</sub> | 26.99                   |

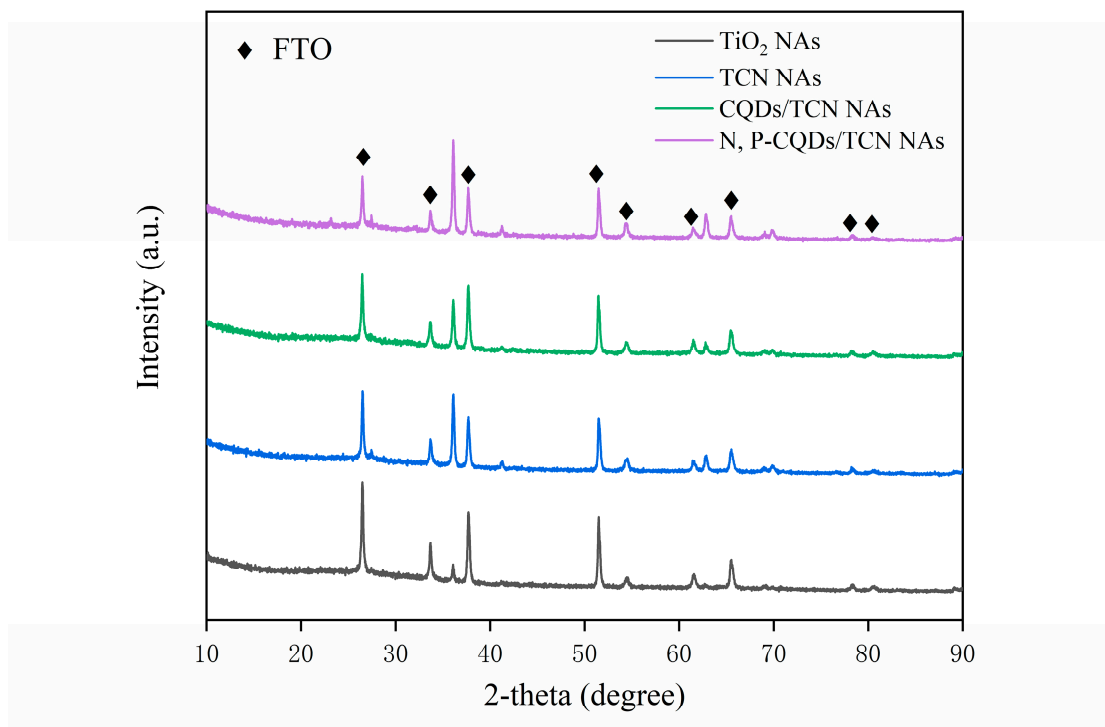

Figure S1 XRD results of TiO<sub>2</sub> NAs, TCN NAs, CQD/TCN NAs, and N, P-CQD/TCN NAs.

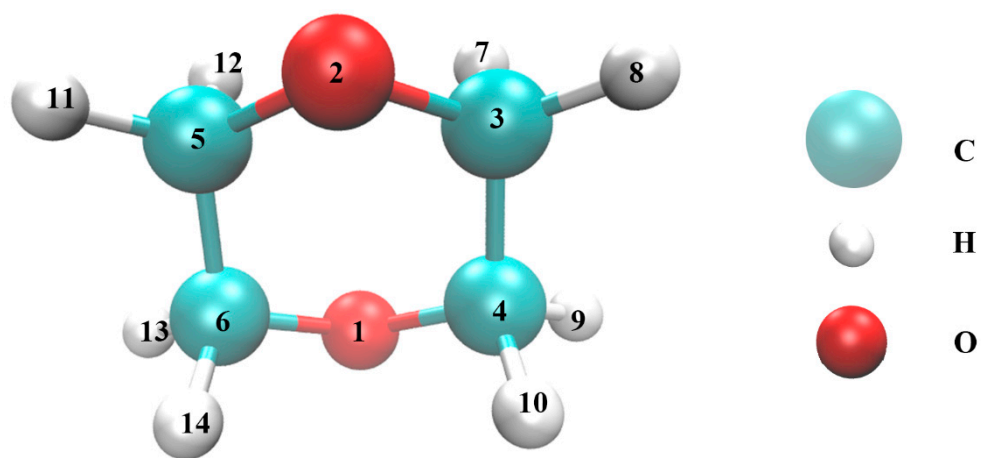

Figure S2 Structural formula of 1,4-D optimized using DFT.

RT: 0.00 - 38.52

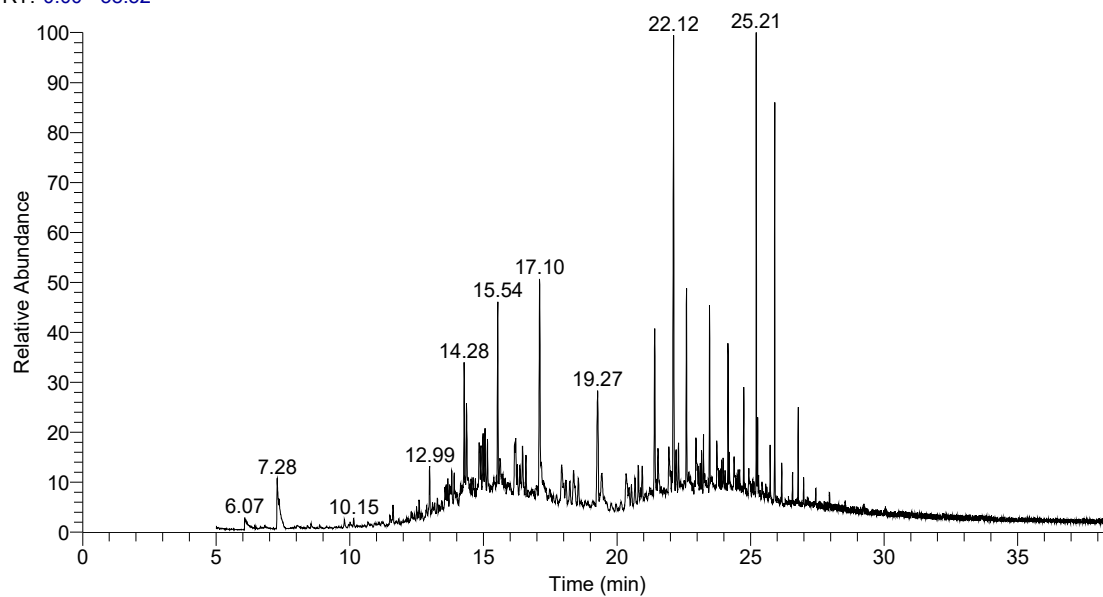

Figure S3 Mass spectrometry results of the GCMS analysis on the pretreated pesticide wastewater.
